# Supplementary material for: Revisiting barriers to implementation of bioinformatics into life sciences education
Source: Frontiers journal article supplement (doi:10.3389/feduc.2023.1317191), 2023-11-30
Supplement: Data_Sheet_2.DOCX [file Data_Sheet_2.DOCX]

**Focus Group Invitation**

Dear XXX,

Since 2013, the Network for Integrating Bioinformatics into Life Sciences Education (NIBLSE) has been working to understand the barriers faculty face when trying to incorporate bioinformatics into their teaching. Our interest in this issue was piqued by a result from a nationwide survey we conducted in 2016, indicating that those in underrepresented groups face the most challenges in this area.

As a follow-up to our 2016 study, we conducted a second nationwide survey in 2021--you may have completed it--that focused on barriers to integration and are working on analyzing the data that was generated. To gain further insight into our results, we are now organizing virtual focus groups that will delve into some of the more interesting results in detail. Each focus group will consist of approximately six to eight people and will last about an hour. Participants will receive a wine carafe set with the NIBLSE logo.

The focus groups will take place on the days/times below. If you would be interested and willing to join us, please fill out this form. We would love to have you.

If you have any questions or concerns, please let me know.

The NIBLSE Team

This invitation will be sent to the Life Science Faculty on the mailing list we purchased as well as to individuals who will push it out to their networks, including members of the Genomic Data Science Network (<https://www.gdscn.org>); the National Association for Equal Opportunity in Higher Education (<https://www.nafeonation.org/>); the Society for Advancing Chicanos/Hispanics and Native Americans in STEM (<https://www.sacnas.org>); and the American Association of Community Colleges (<https://www.aacc.nche.edu>). NIBLSE is also a member of the Quantitative Undergraduate Biology Education and Synthesis ([https://qubeshub.org](https://qubeshub.org/)) and will post information there as well on the NIBLSE page and ask for it to be included in their monthly newsletter.
